# Supplementary material
Source: MDPI journal article supplement (https://www.mdpi.com/2673-4133/3/2/8)
Supplement: s1 [file s1]

Archive with 2 entries (2 files):
- Supplement S1_Phase 2 data tables for signal crayfish_corrected_after_proofread.xlsx
- Supplement S2_Phase 3 decision steps for signal crayfish.pdf
