# Supplementary material
Source: MDPI journal article supplement (https://www.mdpi.com/2673-4133/3/2/8)
Supplement: s1 [file s1 › Supplement S1_Phase 2 data tables for signal crayfish_corrected_after_proofread.xlsx]

## Sheet: Table S1
Table S1. Life-history characteristics that should be targeted to inform a population model for signal crayfish management.
Characteristic	General	Realistic	Precise	References
Life span	Up to 20 years.	Ages up to 11 - 16 years in nature.	Age-body mass and age-length relationships known. Age-dependent survival curves for specific sites exist.	Holdich, 2002; Flint, 1975a; Belchier et al., 1998; Westman et al., 1999; Vogt, 2018
Reproductive/breeding season	Controlled by hormones that are regulated by photoperiod and temperature.	Mid September to November.	Mating observed from September when the water temperature dropped to 13–14°C until November. Spawning occurred within one week after mating.	Holdich, 2002; Stephens, 1952; Dubé & Portelance, 1992; Mason, 1975; Guan and Wiles, 1999; Capurro et al., 2015
Reproductive frequency		Once a year.		Holdich, 2002; Wickins and Lee, 2002
Reproductive output/clutch size	3-724 eggs.	Size-dependent fecundity.	Mean pleopodal fecundity estimates from 110 - 262 eggs; estimated number of eggs per female ranging from 130 to 724 eggs (cephalothorax length 30.9–70.2 mm).	Holdich, 2002; McGriff 1983; Abrahamsson & Goldman, 1970; Holdich et al., 2006; Guan and Wiles, 1999; Capurro et al., 2015; Chybowski, 2013
Onset of maturation	Depends on water temperature, habitat complexity and crayfish density.	Varies from 1 to 3 years, most common 2 years.	Maturation occurs at 25 to 47mm carapace length (CL) in different populations in the filed.	Holdich, 2002; Abrahamsson, 1971; Flint, 1975b; Westman et al., 1993a; Guan and Wiles, 1999; Capurro et al., 2015; Shimizu and Goldman, 1983
Hatching (eggs)/germination (seeds) rate	Controlled by water temperature.	Ranges from 166 to 280 days.	From late March to the end of July. Juveniles hatch from May to July.	Holdich, 2002; Mason, 1977; Lewis & Horton, 1997; Flint, 1975b; McGriff, 1983; Abrahamsson & Goldman, 1970; Capurro et al., 2015
Immature transition rate (including metamorphosis)1
Sex ratio	1:1 in average.		Sex ratio about 1:1 (throughout the year and in August (before mating).	Holdich, 2002; Lewis, 1998; Capurro et al., 2015; Westman et al., 1999
Recruitment rate	Recruitment mostly affected by habitat complexity and density.	10 % - 52 % of hatched juveniles become mature.	Filed-based assessments of recruitment exist ( i.e. 44% in river in UK).	Olsson and Nyström, 2008; González et al., 2010; Holdich et al., 2006; Guan and Wiles, 1999
Survival rate	Dependent upon abiotic and biotic factors and crayfish density.	Estimated survival to maturity from 10-52%. Survival rates in Swedish northern water bodies are lower than in southern water bodies.	Mean juvenile survival rate signiciantly decreases with increasing desnity: from 86.33% (at density 100 individuals/m2) to 39.13% (at 1,000 ind./m2).	Holdich et al., 2006; Bohman and Edsman, 2011; González et al., 2010
Growth rate2	Growth through molting. Moult frequency depends on temperature, food availability, and crayfish age; juveniles moult more frequently than adults.	Moult increment (MI) incrases until adult crayfish reach certain size. After that MI decreases. Mature males grow faster than mature females (larger MIs and more frequent moulting).	Percentage moult increment (PCMI) and the annual percentage moult increment (APCMI) decreased with increase in CL. Mean annual increment (AMI) of males higher (11.7 -5.1 mm) than of females (8.4 - 3.4 mm) of similar size.	Holdich, 2002; Lowery & Holdich, 1988; McGriff, 1983; Westman et al., 1993b; Mason, 1975; Shimizu & Goldman, 1983; Guan and Wiles, 1999
Seedling emergence; emergence after hibernation; emergence of new generation
Dormancy duration (inactive life stages, e.g., hibernation, soil seed bank)
1 Includes discrete “growth” rates for transition of immature life stages depicted in stage-based models (Caswell 2001)
2 Includes continuous growth rate for used for size-based functions

## Sheet: Table S2
Table S2. Population and spatial characteristics that should be targeted to inform population model for signal crayfish management.
Characteristic	General	Realistic	Precise	References
Density dependence		Higher density retards growth of smaller individuals and causes higher aggression and injury frequency.	Growth and survival as a function of density.	González et al., 2010; Flint and Goldman, 1977; Savolainen et al., 2004
Population size		Population size dependent upon habitat characteristics, substrate composition and population age (newly established vs. long-established).	Field-based estimates of crayfish density (no. of individuals/m2) available for multiple populations. Depending on the water body type (lake, river, stream) and trapping method applied, these densities range from 0.71 - 110.4 crayfish/m2.	Holdich, 2002; Abrahamsson and Goldman, 1970; Flint and Goldman, 1977; Guan and Wiles, 1996; Westman et al., 1999; Chadwick et al. 2020; but see also references in 'Density dependence' (Table 2) and 'Habitat features'(Table 2)
Spatial Metapopulation structure
Movement		Most crayfish move relatively short distances, with a small number of individuals making larger movements.	The maximum distance in home range about 400 m; 40% of signal crayfish moved over 100 m. No significant directionality to the movements.	Holdich, 2002; Flint, 1977; Lewis, 1998; Bubb et al., 2006a; Bubb et al., 2006b
Habitat features	More diverse habitats support higher densities.	In river ecosystems pools are preferred over riffles by adult crayfish. Habitat quality (number of available shelters and shading) important determinant of resource capacity.	Substrate important determinant of density and size of crayfish at the microhabitat scale (<1 m). Habitat preference size-specific with smaller crayfish preferring shallow, gravel-dominated sites. Habitat complexity (especially shelter availability) significantly affects juvenile recruitment.	Ranta & Lindström, 1992; Wooster et al., 2012; Wutz and Geist, 2013; Harrison et al., 2006; Olsson and Nyström, 2008; but see also references in 'Density dependence' (Table 2)
Geographical range	Native in the west part of Nort America, Invasive in Europe and Japan.	Temperature limited.	Occurrence determined by field-based surveys in Europe: present in 29 European countries.	Holdich, 2002; Lewis, 2002; Laurent, 1980; Kouba et al., 2014; but see also references in 'Habitat features' (Table 2) and 'Habitat classification/suitability' (Table 2)
Habitat classification/suitability	Streams, rivers, natural & anthoropogenic lakes, even brackish water.	Wide temperature acclimation range (up to 33°C). May survive long periods at a salinity of 21 ppt.	Field-based habitat quality linked to survival. A number of studied populations in suitable habitats: within optimal temperature range and with sufficient habitat complexity.	Holdich 2002; Mason, 1963; Miller, 1960; Becker et al., 1975; Rutledge & Pritchard, 1981; Chybowski, 2013; Olsson and Nyström, 2008; Savolainen et al., 2003; but see also references in 'Habitat features' (Table 2) and 'Environmental conditions' (Table 3)

## Sheet: Table S3
Table S3. External factors that should be targeted to inform population model for signal crayfish management.
Characteristic	General	Realistic	Precise	References
Predation/herbivory	Opportunistic polytrophic feeders. Essential energy transformers between several trophic levels in both lotic and lentic habitats.		Food source for many teleost fish specie, preyed upon by many mammal and avian predators. Signal crayfish negatively impacts macrophyte biomass, cover and species richness (especially molusks). Detritus among the most important food sources. Ontogenic shift in diet, with juveniles consuming more animal material.	Holdich, 2002; Momot et al., 1978; Goddard, 1988; Guan & Wiles, 1998, Mason, 1975; Hepworth & Duffield, 1987; Hogger, 1988; Dobler and Geist, 2021; Nyström et al., 1996
Competition	Successful competitors to native European and other invasive crayfish.	Signal crayfish can withstand competition pressure from other successful invasive and native species in staged trials.		Holdich, 2002; Lodge et al., 2000; Söderbäck, 1992, 1994, 1995; Hudina et al., 2011; Westman et al., 2002
Environmental conditions	Temperature range, temperature maximums, precipitation extremes, seasonality and altitude - the most important parameters driving signal crayfish habitat suitability.	Wide optimal thermal range (18-26°C).	Quantitative relationships between temperature, feeding rates and growth exist.	Westman et al., 1999; Chucholl, 2016; Preau et al., 2020; Lovrenčić et al., 2022; Jaklič et al., 2015; Rodríguez Valido et al., 2020; but see also references in 'Habitat features' (Table 2), 'Habitat classification/suitability' (Table 2) and 'Stressors- abiotic, other' (Table 3)
Stressors - pathogens	Vectors of Aphanomyces astaci pathogen, to which they are relatively tolerant.	Multiple native European crayfish species are susceptible to infection by A. astaci, genotype carried by the signal crayfish is highly virulent.	Moratlity effects well established. Effect on growth are lacking.	Jussila et al., 2021; Svoboda et al., 2016; Thomas et al., 2020; Aydin et al., 2014
Stressors – abiotic, other		Low water temperature adversely affects spawning frequency and egg hatching. Temperature extremes for prolonged periods affect survival and population size. Ca concentration is a limiting factor as well as salinity over 28 promils, pH < 6.		Holdich et al., 2006; Westman et al., 1999; but see also references in 'Environmental conditions' (Table 3)
Existing management	Different approaches - ranging from manual control, to chemical (biocidal), pyhsical and autocidal control.	Approaches to crayfish control should be site-specific. Each of existing methods has its limitations and drawbacks.	The efficacy of specific at-site applications of different approaches documented.	Manfrin et al., 2019; Jussila et al., 2021; Peay et al., 2006; Sandodden, 2019; Krieg et al., 2021; Stebbing, 2016
Indirect effects (obligatory relationships)

## Sheet: S4 References
LIST OF REFERENCES
Abrahamsson, S.A.A.; Goldman, C.R. Distribution, density and production of the crayfish Pacifastacus leniusculus Dana in Lake Tahoe, California-Nevada. Oikos 1970, 21, 83-91. https://doi.org/10.2307/3543843
Abrahamsson, S.A.A. Density, growth and reproduction in populations of Astacus astacus and Pacifastacus leniusculus in an isolated pond. Oikos 1971, 22, 373-80. https://doi.org/10.2307/3543861
Aydin, H.; Kokko, H.; Makkonen, J.; Kortet, R.; Kukkonen, H.; Jussila, J. The signal crayfish is vulnerable to both the As and the PsI-isolates of the crayfish plague. Knowl. Managt. Aquatic Ecosyst. 2014, 413, 03. https://doi.org/10.1051/kmae/2014004
Becker, C.D.; Genoway, R.G.; Merril, J.A. Resistance of the north-western crayfish Pacifastacus leniusculus (Dana) to elevated temperatures. Trans. Am. Fish. Soc. 1975, 2, 374-87. https://doi.org/10.1577/1548-8659(1975)104<374:ROANCP>2.0.CO;2
Belchier, M.; Edsman, L.; Sheehy, M.R.J.; Shelton, P.M.J. Estimating age and growth in long-lived temperate freshwater crayfish using lipofuscin. Freshw. Biol. 1998, 39, 439-46. https://doi.org/10.1046/j.1365-2427.1998.00292.x
Bohman, P.; Edsman, L. Status, Management and Conservation of Crayfish in Sweden: Results and the Way Forward. Freshw. Crayfish 2011, 18, 19-26. https://doi.org/10.5869/fc.2011.v18.19
Bubb, D.H.; Thom, T.J.; Lucas, M.C. Movement, dispersal and refuge use of co-occurring introduced and native crayfish. Freshw. Biol. 2006a, 51, 1359-1368. https://doi.org/10.1111/j.1365-2427.2006.01578.x
Bubb, D.H; Thom, T.J.; Lucas, MC. Movement patterns of the invasive signal crayfish determined by PIT telemetry. Can. J. Zool. 2006b, 84, 1202-1209. https://doi.org/10.1139/z06-100
Capurro, M.; Galli, L.; Mori, M.; Salvidio, S.; Arillo, A. Reproductive cycle of Pacifastacus leniusculus (Dana) (Crustacea: Decapoda) from the Brugneto Lake (Liguria, northwest Italy). Ital. J. Zool. 2015, 82, 366-377. https://doi.org/10.1080/11250003.2015.1022235
Chadwick, D.D.A.; Pritchard, E.G.; Bradley, P.; Sayer, C.D.; Chadwick, M.A.; Eagle, L.J.B.; Axmacher, J.C. A novel “triple drawdown” method highlights deficiencies in invasive alien crayfish survey and control techniques. J. Appl. Ecol. 2020, 58, 316-326. https://doi.org/10.1111/1365-2664.13758
Chucholl, C. The bad and the super-bad: prioritising the threat of six invasive alien to three imperilled native crayfishes. Biol. Invasions 2016, 18, 1967-1988. https://doi.org/10.1007/s10530-016-1141-2
Chybowski, Ł. Absolute fecundity of two populations of signal crayfish, Pacifastacus leniusculus (Dana). Fish. Aquat. Life 2013, 21, 357-362. https://doi.org/10.2478/aopf-2013-0036
Dobler, A.; Geist, J. Impacts of native and invasive crayfish on three native and one invasive freshwater mussel species. Freshw. Biol. 2021, 67, 389-403. https://doi.org/10.1111/fwb.13849.
Dubé, P.; Portelance, B. Temperature and photoperiod effects of ovarian maturation and egg laying of the crayfish, Orconectes limosus. Aquaculture 1992, 102, 161-168. https://doi.org/10.1016/0044-8486(92)90298-Y
Flint, R.W.; Goldman, C.R. Crayfish growth in Lake Tahoe: effects of habitat variation. J. Fish. Res. Board Can. 1977, 34, 155–159. https://doi.org/10.1139/f77-022
Flint, R.W. Growth in a population of the crayfish Pacifastacus leniusculus from a subalpine lacustrine environment. J. Fish. Res. Board Can. 1975a, 32, 2433-2440. https://doi.org/10.1139/f75-280
Flint, R.W. The natural history, ecology, and production of the crayfish Pacifastacus leniusculus in a subalpine lacustrine environment. Doctoral thesis, University of California, Davis, 1975b.
Flint, R.W. Seasonal activity, migration and distribution of the crayfish, Pacifastacus leniusculus, in Lake Tahoe. Am. Midl. Nat. 1977, 97, 280-292. https://doi.org/10.2307/2425094
Goddard, J.S. Food and feeding. In Freshwater Crayfish: Biology, Management and Exploitation; Holdich, D.M., Lowery, R.S., Eds.; Croom Helm: London, England, 1988; pp. 145-166.
González, Á.; Celada, J.; Gonzalez, R.; García, V.; Carral, J.; Sáez-Royuela, M. Increasing Density in Artificial Incubation of Crayfish Eggs (Pacifastacus leniusculus, Astacidae). Freshw. Crayfish 2010, 17, 19-21. https://doi.org/10.5869/fc.2010.v17.19
Guan, R.Z.; Wiles, P.R. Growth and reproduction of the introduced crayfish Pacifastacus leniusculus in a British lowland river. Fish. Res. 1999, 42, 245-259. https://doi.org/10.1016/S0165-7836(99)00044-2
Guan, R.; Wiles, P.R. Growth, density and biomass of crayfish, Pacifastacus leniusculus, in a British lowland river. Aquat. Living Resour. 1996, 9, 265-272. https://doi.org/10.1051/alr:1996030
Guan, R.; Wiles, P.R. Feeding ecology of the signal crayfish Pacifastacus leniusculus in a British lowland river. Aquaculture 1998, 169, 177-193. https://doi.org/10.1016/S0044-8486(98)00377-9
Hepworth, D.K.; Duffield, D.J. Interactions between an exotic crayfish and stocked rainbow trout in Newcastle Reservoir, Utah. N. Am. J. Fish. Manag. 1987, 7, 554-561. https://doi.org/10.1577/1548-8659(1987)7<554:IBAECA>2.0.CO;2
Hogger, J.B. Ecology, population biology and behaviour. In Freshwater Crayfish: Biology, Management and Exploitation; Holdich, D.M., Lowery, R.S., Eds.; Croom Helm: London, England, 1988; pp. 114-144.
Holdich, D.M. Biology of Freshwater Crayfish. Blackwell Science: Oxford, England, 2002.
Holdich, D.M., Haffner, P.M., Noel, P.Y. Species files. In Atlas of crayfish in Europe; Souty-Grosset, C., Holdich, D.M., Noel, P.Y., Reynolds, J.D., Haffner, P., Eds.; Muséum National d’Histoire Naturelle, Paris, France, 2006; pp. 50-129.
Hudina, S.; Galić, N.; Roessink, I.; Hock, K. Competitive interactions between co-occurring invaders: identifying asymmetries between two invasive crayfish species. Biol. Invasions 2011, 13, 1791-1803. https://doi.org/10.1007/s10530-010-9933-2
Jaklič, M.; Simčič, T.; Vrezec, A. Comparison of the thermal niche between native and non-native crayfish species. In Proceedings of the European Crayfish Conference: Research & Management, Landau, Germany, 2015; Schrimpf, A., Schulz, R., Chucholl, C., Füreder, L., Jussila, J., Maguire, I., Pârvulescu, L., Petrusek, A., Souty-Grosset, C., Vrålstad, T., Eds.
Jussila, J.; Edsman, L.; Maguire, I.; Diéguez-Uribeondo, J.; Theissinger, K. Money Kills Native Ecosystems: European Crayfish as an Example. Front. Ecol. Evol. 2021, 9, 648495. https://doi.org/10.3389/fevo.2021.648495
Kouba, A.; Petrusek, A.; Kozák, P. Continental-wide distribution of crayfish species in Europe: update and maps. Knowl. Managt. Aquatic Ecosyst. 2014, 413, 05. https://doi.org/10.1051/kmae/2014007
Krieg, R.; King, A.; Zenker, A. Barriers against invasive crayfish species in natural waters and fish passes - Practical experience. Glob. Ecol. Conserv. 2021, 25, e01421. https://doi.org/10.1016/j.gecco.2020.e01421
Laurent, P.J. Stocking of lakes with American signal crayfish. In Proceeding of the 1980 Fisheries Management Course, Romsey, UK, 1980.
Lewis, S.D. Pacifastacus. In Biology of Freshwater Crayfish; Holdich, D.M., Ed.; Blackwell Science: Oxford, England, 2002; pp. 511-540.
Lewis, S.D.; Horton, H.F. Life history and population dynamics of signal crayfish, Pacifastacus leniusculus, in Lake Billy Chinook, Oregon. Freshw. Crayfish 1997, 11, 34-53.
Lewis, S.D. Life history, population dynamics, and management of signal crayfish in Lake Billy Chinook, Oregon. Master’s thesis, Oregon State University, Corvallis, 1998.
Lodge, D.M.; Taylor, C.A.; Holdich, D.M.; Skurdal, J. Nonindigenous crayfishes threaten North American freshwater biodiversity. Fisheries 2000, 25, 7-19.
Lovrenčić, L.; Temunović, M.; Gross, R.; Grgurev, M.; Maguire, I. Integrating population genetics and species distribution modelling to guide conservation of the noble crayfish, Astacus astacus, in Croatia. Sci Rep 2020, 12, 2040. https://doi.org/10.1038/s41598-022-06027-8
Lowery, R.S.; Holdich, D.M. Pacifastacus leniusculus in North America and Europe, with details of the distribution of introduced and native crayfish species in Europe. In Freshwater Crayfish: Biology, Management and Exploitation; Holdich, D.M., Lowery, R.S., Eds.; Croom Helm: London, England, 1988; pp. 283-308.
Mason, J.C. Life history and production of the crayfish, Pacifastacus leniusculus trowbridgii (Stimson), in a small woodland stream. Master’s thesis, Oregon State University, Corvallis, 1963.
Mason, J.C. Crayfish production in a small woodland stream. Freshw. Crayfish 1975, 2, 449-479. https://doi.org/10.5869/fc.1975.v2.449
Mason, J.C. Reproductive efficiency of Pascifastacus leniusculus (Dana) in culture. Freshw. Crayfish 1977, 3, 101-117.
McGriff, D. Growth, maturity, and fecundity of the crayfish, Pacifastacus leniusculus, from the Sacramento–San Joaquin Delta. Calif. Fish Game 1983, 69, 227-242.
Miller, G.C. Taxonomy and certain biological aspects of the crayfish of Oregon and Washington. Master’s thesis, Oregon State University, Corvallis, 1960.
Momot, W.T.; Growing, H.; Jones, P.D. The dynamics of crayfish and their role in ecosystems. Am. Midl. Nat. 1978, 99, 10-35. https://doi.org/10.2307/2424930
Nyström, P.; Brönmark, C.; Graneli, W. Patterns in benthic food webs: a role for omnivorous crayfish?. Freshw. Biol. 1996, 36, 631-646. https://doi.org/10.1046/j.1365-2427.1996.d01-528.x
Olsson, K.; Nyström, P. Non-interactive effects of habitat complexity and adult crayfish on survival and growth of juvenile crayfish (Pacifastacus leniusculus). Freshw. Biol. 2008, 54, 35-46. https://doi.org/10.1111/j.1365-2427.2008.02089.x
Peay, S.; Hiley, P.D.; Collen, P.; Martin, I. Biocide treatment of ponds in Scotland to eradicate signal crayfish. Bull. Fr. Pêche Piscic. 2006, 380-381, 1363-1379. https://doi.org/10.1051/kmae:2006041
Préau, C.; Nadeau, I.; Sellier, Y.; Isselin-Nondedeu, F.; Bertrand, R.; Collas, M.; Capinha, C.; Grandjean, F. Niche modelling to guide conservation actions in France for the endangered crayfish Austropotamobius pallipes in relation to the invasive Pacifastacus leniusculus. Freshw. Biol. 2020, 65, 304-315. https://doi.org/10.1111/fwb.13422
Ranta, E.; Lindström, K. Power to hold sheltering burrow by juveniles of the signal crayfish, Pacifastacus leniusculus. Ethology 1992, 92, 217-226. https://doi.org/10.1111/j.1439-0310.1992.tb00961.x
Rodríguez Valido, C.A.; Johnson, M.F.; Dugdale, S.J.; Cutts, V; Fell, H.G.; Higgins, E.A.; Tarr, S.; Templey, C.M.; Algar, A.C. Thermal sensitivity of feeding and burrowing activity of an invasive crayfish in UK waters. Ecohydrology 2020, 14, e2258. https://doi.org/10.1002/eco.2258
Rutledge, P.S.; Pritchard, A.W. Scope of activity in the crayfish Pacifastacus leniusculus. Am. J. Physiol. 1981, 240, 87-92. https://doi.org/10.1152/ajpregu.1981.240.1.R87
Sandodden, R. Eradication of invasive alien crayfish: past experiences and further possibilities. In Island invasives: scaling up to meet the challenge; Veitch, C.R., Clout, M.N., Martin, A.R., Russell, J.C., West, C.J., Eds.; IUCN: Gland, Switzerland, 2019; Occasional Paper SSC no. 62., pp. 405-409.
Savolainen, R.; Ruohonen, K.; Tulonen, J. Effects of bottom substrate and presence of shelter in experimental tanks on growth and survival of signal crayfish, Pacifastacus leniusculus (Dana) juveniles. Aquac. Res. 2003, 34, 289-297. https://doi.org/10.1046/j.1365-2109.2003.00817.x
Shimizu, S.J.; Goldman, C.R. Pacifastacus leniusculus (Dana) production in the Sacramento River. Freshw. Crayfish 1983, 5, 210-228.
Söderbäck, B. Predator avoidance and vulnerability of two co-occurring crayfish species, Astacus astacus (L.) and Pacifastacus leniusculus (Dana). Ann. Zool. Fenn. 1992, 29, 253-259.
Söderbäck, B. Interactions among juveniles of two freshwater crayfish species and a predatory fish. Oecologia 1994, 100, 229-235. https://doi.org/10.1007/BF00316949
Söderbäck, B. Replacement of the native crayfish Astacus astacus by the introduced species Pacifastacus leniusculus in a Swedish lake: possible causes and mechanisms. Freshw. Biol. 1995, 33, 291-304.
Stephens, G.J. Mechanisms regulating the reproductive cycle in the crayfish Cambarus. 1. The female cycle. Physiol. Zool. 1952, 25, 70-83.
Thomas, J.R.; Robinson, C.V.; Mrugała, A.; Ellison, A.R.; Matthews, E.; Griffiths, S.W.; Consuegra, S.; Cable, J. Crayfish plague affects juvenile survival and adult behaviour of invasive signal crayfish. Parasitology 2020, 147, 706-714. https://doi.org/10.1017/S0031182020000165
Vogt, G. Growing old: Aging in Crustacea. In Life histories; Thilel, M., Wellborn, G.A., Eds.; Oxford University Press: Oxford, UK, 2018; pp. 179-202.
Westman, K.; Savolainen, R.; Pursiainen, M. A comparative study on the reproduction of the noble crayfish, Astacus astacus (L), and the signal crayfish, Pacifastacus leniusculus (Dana), in a small forest lake in southern Finland. Freshw. Crayfish 1993a, 9, 466-476.
Westman, K.; Savolainen, R.; Pursiainen, M. A comparative study of the growth and moulting of the noble crayfish, Astacus astacus (L), and the signal crayfish, Pacifastacus leniusculus (Dana), in a small forest lake in southern Finland. Freshw. Crayfish 1993b, 9, 451-465.
Westman, K.; Savolainen, R.; Julkunen, M. Replacement of the native crayfish Astacus astacus by the introduced species Pacifastacus leniusculus in a small, enclosed Finnish lake: a 30-year study. Ecography 2002, 25, 53-73. https://doi.org/10.1034/j.1600-0587.2002.250107.x
Westman, K.; Savolainen, R.; Pursiainen, M. Development of the introduced North American signal crayfish, Pacifastacus leniusculus (Dana), population in a small Finnish forest lake in 1970-1997. Boreal Environ. Res. 1999, 4, 387-407.
Wickins, J.F.; Lee, D.O'C. Crustacean Farming: Ranching and Culture, 2nd Edition. Blackwell Science: Oxford, England, 2002.
Wooster, D.; Snyder J.L.; Madsen, A. Environmental correlates of signal crayfish, Pacifastacus leniusculus (Dana, 1852), density and size at two spatial scales in its native range. J. Crust. Biol. 2012, 32, 741-752. https://doi.org/10.1163/193724012X651144
Wutz, S.; Geist, J. Sex- and size-specific migration patterns and habitat preferences of invasive signal crayfish (Pacifastacus leniusculus Dana). Limnologica 2013, 43, 59-66. https://doi.org/10.1016/j.limno.2012.02.002.
